# Supplementary material for: New Australovenator Hind Limb Elements Pertaining to the Holotype Reveal the Most Complete Neovenatorid Leg
Source: PubMed Central journal article supplement (PMC3722220; doi:10.1371/journal.pone.0068649), 2013-07-24
Supplement: pone.0068649.s005.pdf [file pone.0068649.s005.pdf]

*Australovenator wintonensis* Supplementary Figure 5 Right Astragalus

*Australovenator* specimens were discovered by and are housed in The Australian Age of Dinosaurs Museum of Natural History. Access to the specimens was granted by founder and chairman David A. Elliott. Computed tomography (CT) scanning: Sarah Wooldridge (Queensland Xray Mackay). Model construction: Matt A. White (University of Newcastle). Visualisation: David G. Barnes (Monash University).
